# Supplementary material for: The molecular basis for pore pattern morphogenesis in diatom silica
Source: Research Square preprint supplement (doi:10.21203/rs.3.rs-1662246/v1), 2022-05-19
Supplement: Supplementary file 1 [file 9a2099dc69f89e2ffcbf6417.xlsx]

## Sheet: SDV_Sin1-like (IB) (4)
UniProt_ID	Thaps3_PID	Mass (kDa)	Protein domains (InterPro)	Best BLAST® hit , E-value
B8CE53	789	52.631	EF-Hand 1, calcium-binding site, ATP binding site	calcium-dependent protein kinase, 0
B8CF84	843	23.782	Small GTP-binding protein; Small GTPase	Rab1/RabD-family small GTPase, 3.2E-112
B8BTB5	2078	12.229	-	-
B8BTR9	2233	16.937	ATPase subunit	V-type ATPase 16 kDa proteolipid subunit, 3.2E-95
B8BVT3	2946	27.106	Adenylate kinase/UMP-CMP kinase	UMP-CMP kinase, 1.1E-87
B8BYN5	3748	32.398	Mitochondrial substrate/solute carrier	mitochondrial carrier, 4.2E-93
B8C237	5147	67.98	Ankyrin-repeat	ankyrin repeat protein, 2.1E-33
B8C387	5555	29.073	Plastid lipid-associated protein/fibrillin	plastid lipid associated protein, 3.1E-40
B8C4Q7	6580	35.723	-	-
B8CCV3	9991	13.712	Linker histone H1/H5	-
B8LCC9	10337	93.482	-	-
B8BPZ9	20670	74.068	-	-
B8BRJ3	20931	72.834	-	-
B8BSB4	21058	53.639	Ankyrin-repeat	-
B8BUG0	21292	71.029	Citrate transporter-like	Na+/H+ antiporter NhaD-like permease, 0
B8BY55	21815	50.954	S-adenosylmethionine synthetase, conserved site	methionine S-adenosyl transferase, 0
B8BYQ5	21916	59.917	Armadillo-type fold	-
B8C680	23191	57.593	-	-
B8C482	23225	60.158	Ankyrin-repeat	-
B8C8Q0	24080	21.823	Chlorophyll a/b binding	fucoxanthin chlorophyll a/c protein 5, 1.7E-76
B8CBQ3	24708	44.185	-	-
B8CBQ8	24710	47.713	-	-
B8CBQ9	24711	44.372	-	-
B8CDU5	25199	74.125	-	-
B8CFM1	25735	44.078	-	-
B8CFV4	25772	42.106	Actin/actin-like conserved site	actin, 0
B8CFZ5	25790	29.026	-	-
B5YNY5	29053	36.989	ATPase subunit	V-type H-ATPase subunit C, 4.6E-145
B8CBV3	37123	68.755	ATPase alpha/beta subunits	V-type H+-transporting ATPase subunit A, 0
B8CC80	37509	43.622	ATPase subunit	V-type H+-transporting ATPase subunit D, 3.2E-112
B8CD83	37592	26.523	Protein kinase	Ca2+/calmodulin-dependent protein kinase, 2.0E-61
B8BQL0	39098	91.218	ATPase, nucleotide binding	heat shock protein 110kDa, 0
B8BR92	39173	27.5	ATPase subunit	V-type H+-transporting ATPase subunit D, 1.1E-116
B8BS84	39299	21.006	P-loop containing nucleoside triphosphate hydrolase	Arf1, ARF family GTPase, 2.5E-124
B8BXI4	39847	49.613	AP-2 complex subunit	Clathrin assembly complex, medium subunit, 0
B8C0L1	40522	56.085	ATPase subunit	V-type H+-transporting ATPase subunit B, 0
B5YNJ0	41392	51.971	-	silicon transporter, 0
B8C7W7	41687	101.783	AP complex subunit; calthrin adaptor appendage	AP-1 complex subunit beta-1, 0
B8C360	262564	28.327	ATPase subunit	V-type H+-transporting ATPase subunit H, 0
B8C373	262568	90.5	ATPase domain	transitional endoplasmic reticulum ATPase, 0
B8C8V5	263742	17.94	v-SNARE (coiled-coil)	vesicle-associated membrane protein 7, 4.6E-42
B8C3T7	268958	47.65	-	-
B8C8U9	269540	194.235	Armadillo-type fold; Clathrin heavy-chain (CHCR) repeat	clathrin heavy chain, 0
B8CB19	270227	54.81	Tubulin; Cell division protein FtsZ	plastid division protein FtsZ, 0
B8LEF6	bd1852	47.745	-	-
B8LEF7	bd856	51.922	-	-
Protein ID according to annotation "Thaps3_geneModels_filteredModels2_aa" (http://genome.jgi-psf.org/Thaps3/)
